# Supplementary material for: Effect of Ultrasonography-Guided Corticosteroid Injection vs Placebo Added to Exercise Therapy for Achilles Tendinopathy: A Randomized Clinical Trial
Source: PubMed Central journal article supplement (PMC9274322; doi:10.1001/jamanetworkopen.2022.19661), 2022-07-11
Supplement: jamanetwopen-e2219661-s002.pdf [file jamanetwopen-e2219661-s002.pdf]

## Supplemental Online Content

Johannsen F, Olesen JL, Øhlenschläger TF, et al. Effect of ultrasonography-guided corticosteroid injection vs placebo added to exercise therapy for Achilles tendinopathy: a randomized clinical trial. *JAMA Netw Open*. 2022;5(7):e2219661. doi:10.1001/jamanetworkopen.2022.19661

**eFigure 1.** Secondary Outcome: Improvement in VAS-Morning Pain From Baseline to 1, 2, 3, 6, 12, and 24 Months

**eFigure 2.** Secondary Outcome: Improvement in VAS-Activity Pain From Baseline to 1, 2, 3, 6, 12, and 24 Months

**eFigure 3.** Secondary Outcome: Likert Score at All Time Points

**eTable 1.** Likert Score (-5 to +5) Divided in Groups at All Time Points

**eTable 2.** Likert Score: Number of Patients Much Improved or Cured at All Time Points

**eTable 3.** Likert Score: Mean and 95% CI at All Time Points

This supplemental material has been provided by the authors to give readers additional information about their work.

**eFigure 1.** The Secondary Outcome: Improvement in VAS-Morning Pain From Baseline to 1, 2, 3, 6, 12, and 24 Months. The I bars indicate the 95% CI. Stars indicate significant differences.

### VAS morning pain

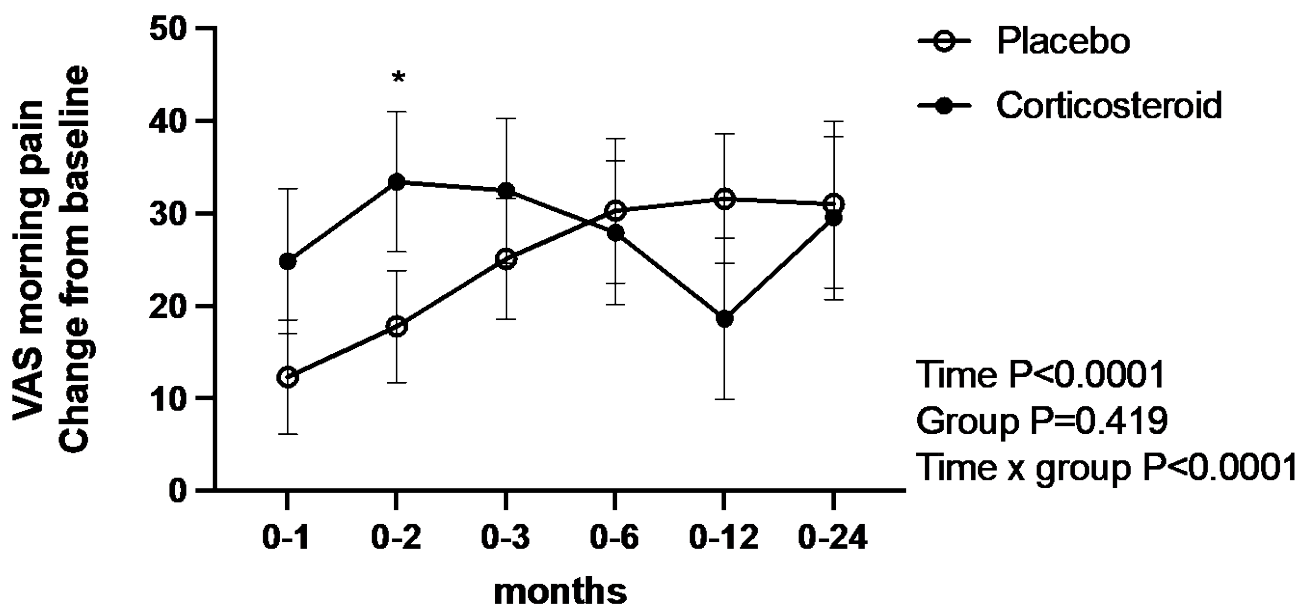

**eFigure 2.** Secondary Outcome: Improvement in VAS-Activity Pain From Baseline to 1, 2, 3, 6, 12, and 24 Months. The I bars indicate the 95% CI. Stars indicate significant differences.

### VAS activity pain

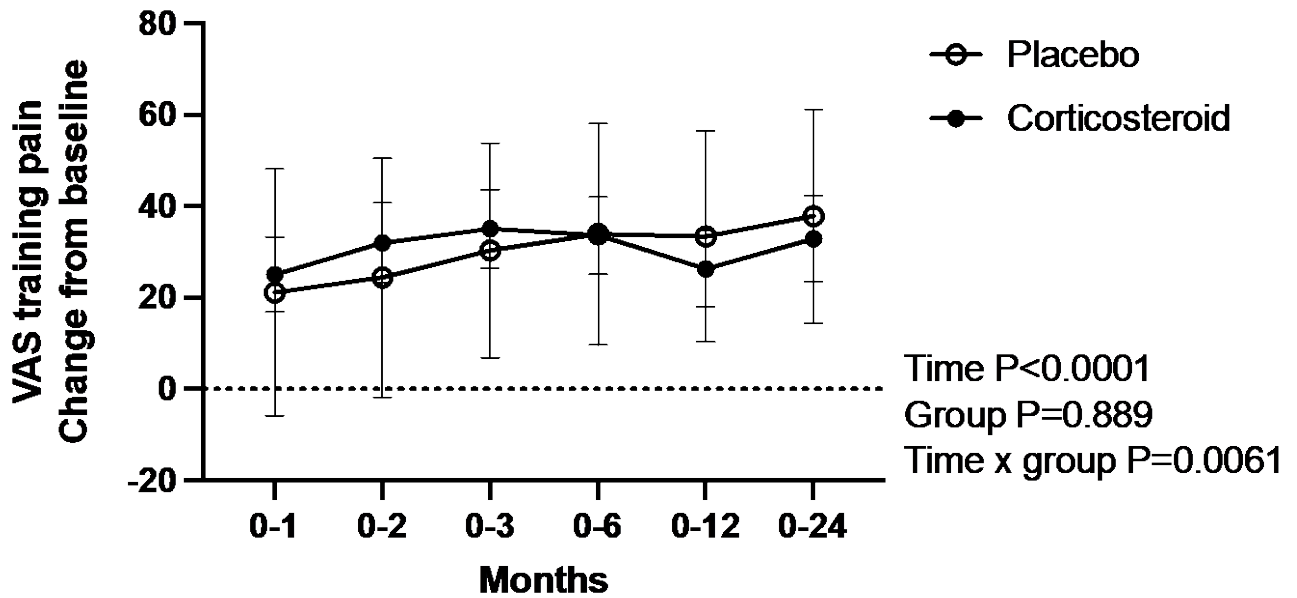

**eFigure 3.** Secondary Outcome: Likert Score at All Time Points. 0 unchanged from entry, 1-2 light improvement, 3-4 much improvement, 5 cured. Negative values are worsening. The I bars indicate the 95% CI. Stars indicate significant differences.

**Likert score**

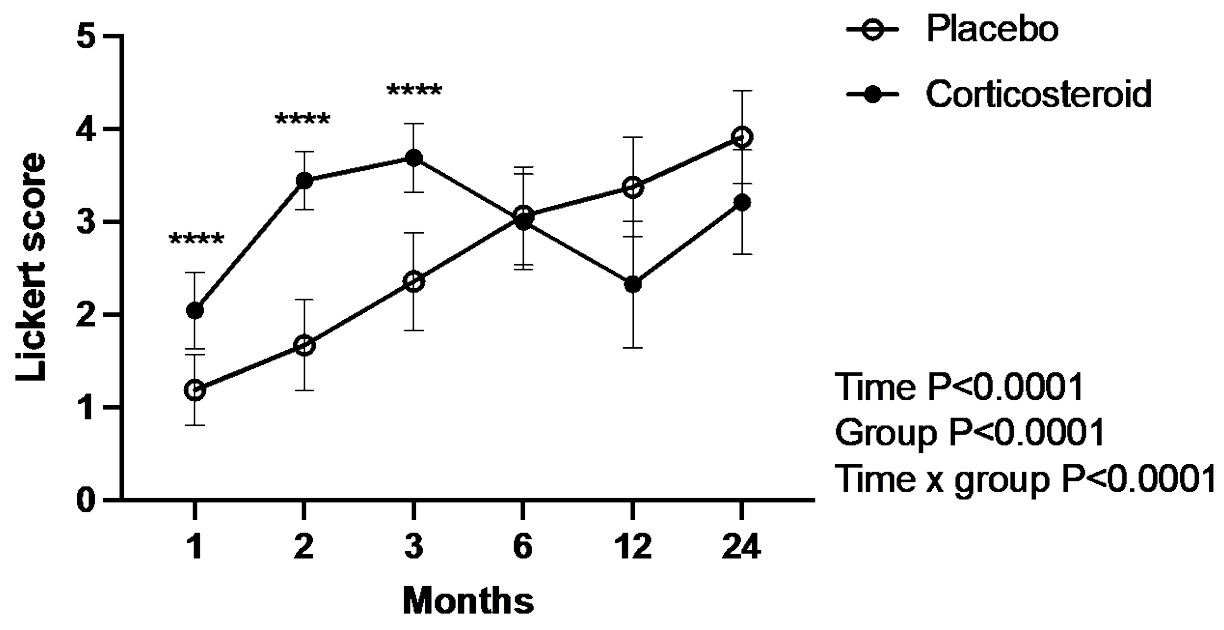

**eTable 1.** Likert Score (-5 to +5) Divided in Groups at All Time Points

0 unchanged from entry, 1-2 light improvement, 3-4 much improvement, 5 cured. Negative values are worsening

| Likert score | Corticosteroid                |                              |                            |            | Placebo                       |                              |                            |            |
|--------------|-------------------------------|------------------------------|----------------------------|------------|-------------------------------|------------------------------|----------------------------|------------|
|              | =< 0<br>Unchanged/<br>worsend | 1-2<br>Slight<br>improvement | 3-4<br>Much<br>improvement | 5<br>cured | =< 0<br>Unchanged/<br>worsend | 1-2<br>Slight<br>improvement | 3-4<br>Much<br>improvement | 5<br>cured |
| 1 month      | 8/45                          | 18                           | 18                         | 1          | 15/48                         | 26                           | 7                          | 0          |
| 2 months     | 1/45                          | 6                            | 33                         | 5          | 15/48                         | 15                           | 17                         | 1          |
| 3 months     | 2/45                          | 3                            | 29                         | 11         | 10/48                         | 11                           | 23                         | 4          |
| 6 months     | 3/42                          | 8                            | 25                         | 6          | 6/48                          | 9                            | 22                         | 11         |
| 12 months    | 9/37                          | 6                            | 18                         | 4          | 5/42                          | 6                            | 17                         | 14         |
| 24 months    | 2/30                          | 5                            | 15                         | 8          | 2/34                          | 2                            | 16                         | 15         |

**eTable 2.** Likert Score: Number of Patients Much Improved or Cured at All Time Points

|           | Corticosteroid cured/ much improved | Placebo cured/ much improved |
|-----------|-------------------------------------|------------------------------|
| 1 month   | 19/45 (42%)                         | 7/48 (15%)                   |
| 2 months  | 38/45 (84%)                         | 18/48 (38%)                  |
| 3 months  | 40/45 (89%)                         | 27/48 (56%)                  |
| 6 months  | 31/42 (74%)                         | 33/48 (69%)                  |
| 12 months | 22/37 (59%)                         | 31/42 (74%)                  |
| 24 months | 23/30 (77%)                         | 31/34 (91%)                  |

**eTable 3.** Likert Score: Mean and 95% CI at All Time Points

| month | Placebo<br>mean | 95% CI      |             | Corticosteroid<br>mean | 95% CI      |             |
|-------|-----------------|-------------|-------------|------------------------|-------------|-------------|
|       |                 | Upper limit | Lower limit |                        | Upper limit | lower limit |
| 1     | 1,184           | 1,567       | 0,801       | 2,043                  | 2,454       | 1,633       |
| 2     | 1,667           | 2,158       | 1,175       | 3,444                  | 3,755       | 3,134       |
| 3     | 2,354           | 2,878       | 1,83        | 3,689                  | 4,056       | 3,322       |
| 6     | 3,063           | 3,593       | 2,532       | 3                      | 3,516       | 2,484       |
| 12    | 3,372           | 3,909       | 2,835       | 2,325                  | 3,006       | 1,644       |
| 24    | 3,914           | 4,417       | 3,412       | 3,212                  | 3,778       | 2,646       |
