# Supplementary material for: Effect of Ultrasonography-Guided Corticosteroid Injection vs Placebo Added to Exercise Therapy for Achilles Tendinopathy: A Randomized Clinical Trial
Source: PubMed Central journal article supplement (PMC9274322; doi:10.1001/jamanetworkopen.2022.19661), 2022-07-11
Supplement: jamanetwopen-e2219661-s003.pdf [file jamanetwopen-e2219661-s003.pdf]

## Data Sharing Statement

Johannsen F, Olesen JL, Øhlenschläger TF, et al. Effect of ultrasonography-guided corticosteroid injection vs placebo added to exercise therapy for Achilles tendinopathy: a randomized clinical trial. *JAMA Netw Open*. 2022;5(7):e2219661. doi:10.1001/jamanetworkopen.2022.19661

### Data

**Data available:** No

### Additional Information

**Explanation for why data not available:** due to European GDPR law
